# Supplementary material for: Rapid, high throughput, automated detection of SARS-CoV-2 neutralizing antibodies against Wuhan-WT, delta and omicron BA1, BA2 spike trimers
Source: PubMed Central journal article supplement — iScience. 2023 Oct 18;26(11):108256. doi: 10.1016/j.isci.2023.108256 (PMC10641509; doi:10.1016/j.isci.2023.108256), 2023-10-18

**Supplemental information**

**Rapid, high throughput, automated detection  
of SARS-CoV-2 neutralizing antibodies against  
Wuhan-WT, delta and omicron BA1, BA2 spike trimers**

**Narayanaiah Cheedarla, Hans P. Verkerke, Sindhu Potlapalli, Kaleb Benjamin McLendon, Anamika Patel, Filipp Frank, William Henry O'Sick, Suneethamma Cheedarla, Tyler Jon Baugh, Gregory L. Damhorst, Huixia Wu, Daniel Graciaa, Fuad Hudaib, David N. Alter, Janetta Bryksin, Eric A. Ortlund, Jeanette Guarner, Sara Auld, Sarita Shah, Wilbur Lam, Dawn Mattoon, Joseph M. Johnson, David H. Wilson, Madhav V. Dhodapkar, Sean R. Stowell, Andrew S. Neish, and John D. Roback**

## Wuhan (Vaccine Strain) – WT DNA synthesized sequence:

ATGTTTCGTGTTCCCTGGTGCTGCTGCCTTTGGTTAGCAGCCAGTGCCTGAACC  
TGACCACCAGAACCAGCTGCCACCTGCTTATACCAATAGCTTTACAAGAGGCGTGTACTACCCTGATAA  
GGTGTTCAGAAGCTCGGTACTCCATCTACTCAGGACCTGTTCCCTGCCCTTCTTTCAGTAATGTGACTGG  
TTCCACGCCATCCACGTGAGCGGCACCAACGGCACCAGAGGTTTCGACAATCCTGTGCTGCCTTTCAATG  
ACGGCGTGTACTTTGCCAGCAGAAAAAGTCCAACATCATCAGAGGCTGGATCTTCGGCACCACCCTGGA  
TTCTAAGACCCAAAGCTGCTTATCGTGAACAACGCCACAAATGTTGTGATCAAGGTGTGCGAATTTTCAG  
TTCTGCAACGACCCCTTTCCTGGGAGTGTACTACCACAAGAACAACAAGAGCTGGATGGAATCTGAGTTCA  
GAGTATATTCTTCTGTAACAACGTACCTTTGAGTACGTGAGCCAGCCGTTCCCTGATGGACCTCGAAGG  
CAAACAAGGCAACTTCAAGAACCCTGAGAGAGTTCGTGTTCAAAAACATCGACGGCTACTTCAAGATCTAC  
AGCAAGCACACCCCATTAACCTGGTGCGGGATCTGCCCAAGGCTTCTCTGCCCTGGAACCCCTCGTGG  
ACCTTCCCATCGGAATCAACATCACCAGATTCAGACACTGTTGGCCCTGCACAGAAGCTACCTGACCCC  
CGGAGATTTCTTACTGCTGGCTGGACCGCCGGCCGCTGCCTACTACGTGGGCTACCTGCAGCTAGAACC  
TTTCTGCTGAAGTACAACGAAAACGGCACAATCACCGACGCCGTGGACTGTGCTTTGGACCCCTGTCTG  
AAACCAAGTGCACCCCTGAAGAGCTTACCCTGGAAAAGGGCATCTACCAGACGAGCAATTTTCAGAGTCCA  
ACCTACCGAATCCATCGTGAATTTCTAACATCACAACCTCTGTCTTTTCGGGGAGGTGTTCAACGCC  
ACAAGATTGCGCAGTGTGTACGCTTGAATCGGAAGAGAATCAGCAACTGTGTTGCGGATTACAGCGTGC  
TGTACAACCTCCGCCAGCTTCTCGACATTTAAGTGTACGGCGTACGCCCCACAAAGCTGAATGATCTTTG  
CTTCCACCAACGTGTACGGGATAGCTTTGTGATCAGAGGCGACGAGGTGCGCCAGATCGCCCCGAGCAG  
ACCGCAAGATAGTACTACTATAACTACAAGCTTCCAGACTTACCAGGCTGTGTGATCGCCCTGGAACCT  
CCAACAACCTGGACTCCAAGGTGGGCGGAAACTACAACCTACCTGTACAGACTGTTTCGGAAAAGCAACCT  
GAAACCTTTTCGAGAGAGACATCAGCACAGAGATCTACCAGGCGGCAGCACCCTTGTAAATGGAGTCGAG  
GGCTTCAATTGCTACTTCCCCCTGCAAAGCTATGGATTTTCAGCCTACAAACGGCGTGGGATACCAGCCCT  
ACCGGTGGTGGTGTGAGCTTCGAGCTGCTGCACGCCCTGCCACAGTGTGCGGTCTTAAGAAAAGCAC  
AAACCTGGTGA AAAACAAGTGCCTGAACTTTAACCTCAACGGCTGACCGGCACCGCGTCTGACAGAA  
TCTAACA AAAAATCTCTGCCGTTCCAGCAGTTTGGGAGAGATATCGCCGACACCACCGACGCCGTGAGAG  
ACCTTCAGACACTGGAATCCTGGACATCACCCCTTGCTCTTTTCGGAGGAGTGTCCGTCATCACACCTGG  
AACCAATACCAGCAATCAGGTGGCTGTGCTGTACCAGGGGGTGAAGTGCACCGAAGTGCCTGTGGCCATC  
CACGCCGACCGCTGACGCTTACATGGCGGTGTACAGCACCAGCAGCAACGTGTTCCAGACCAGAGCCG  
GCTGCTGATCGGCGCGGAGCAGTCAACAACCTCTACGAGTGTGATATCCCTATCGGGGCGCGCATTTG  
CGCGAGCTACCAGACCCAGACCAATAGTCTGGCGCGGTGGTTCTGTGGCCTCTCAGAGCATCATCGCC  
TACACCATGTCCCTGGGCGCTGAGAACTCCGTGGCTTATTCTAACAATAGCATAGCCATTCTACCAACT  
TCACCATTAGCTGACTACCGAAATCCTGCCGCTGCCAGCTGTCCATGACCAAGCAGCGTTGACTGCACCATGTA  
CATTCGCGCGACAGCAGAAATCGAGCAACCTGCTTCTGCAGTACGGTCTTTTCTGCACACAGCTGAAC  
AGAGCGCTGACAGGAATCGCAGTTGAGCAGGACAAGAACACCCAGGAGGTGTTCCGCCAGGTGAAGCAAA  
TTTACAAGACCCCCCATCAAGGACTTCGGCGGCTTCAACTTCAGCCAGATCTGCTGACCCCTCTAA  
GCCAGCAAGCGCAGCTTTCATCGAGGACCTGCTGTTCAACAAGGTGACCCTGGCCGACGCCGGCTTTATC  
AAACAGTACGGCGACTGCCTGGGCGACATCGCCGCGAGGGACCTCATTTGCGCCAGAAATTCACCGGCC  
TGACTGTGCTGCCACCTCTGCTGACCGATGAGATGATCGCTCAGTACACAAGCGCCCTGCTGGCCGGCAC  
CATCACAGCGGATGGACTTCGGCGCTGGCGCAGCTCTGCAGATTCTTTCGCTATGCAGATGGCCAT  
AGATTCAACGGCATTTGGCGTACCCAAAACGTGCTGTATGAAAACAGAAAGCTGATCGCCAACCAAGTTTA  
ATAGCGCCATCGGCAAAAATCCAGGATAGCCTGAGCAGCACCCTAGCGCCCTGGGCAAGCTGCAAGACGT  
GGTGAACCAGAACGCCAAGCCCTGAACACCCCTGGTGAAGCAGCTGAGCAGCAACTTCGGCGCCATTAGC  
AGCGTGTGAAACGACATCCTGAGCAGACTCGACCCCGAGAGCCGAGGTGCAGATCGATAGACTGATCA  
CAGGCAGACTGCAGAGCCTGCAGACCTATGTGACACAGCAGCTGATTCGGGCGCGTGAATCCGGGCCAG  
CGCCAATCTGGCCGCCACCAAGATGAGCGAGTGCCTGCTGGGACAGTCTAAGCGGCTCGATTTCTGCGGC  
AAAGGCTACCACCTGATGAGCTTTCCCAATCCGCTCCTCACGGCGTGTGTTTTCTGCATGTGACATACG  
TGCCAGCCCAAGAGAAGAATTTCAACAACCGCCCTGCCATCTGCCACGACGGCAAGGCCACTTCCCTCG  
GGAAGGCGTATTCTGTGAGCAACGGCACACACTGGTTCGTCACTCAGCGGAACCTTCTACGAGCCCCAGATC  
ATCACAAACAGACAACCTTCGTTTCCGGCAATTGGCAGCTGGTGTGATCGGCATCGTGAACAACACCGTGT  
ACGACCCCTGCAGCCGAGCTGGATAGCTTCAAGGAAGAGCTGGATAAGTACTTCAAGAACCACACTAG  
CCCTGATGTGGATCTTGGCGACATCAGCGGCATCAACCGCAGCGTGGTGAATATCCAGAAAGAGATCGAC  
CGGCTGAACAGGTGGCCAAAGACCTGAACGAGAGCCTGATCGACCTGCAGGAGCTGGGCAAGTACGAGC  
AGTACATCAAGTGGCCTTGGTACATCTGGCTGGGCTTTATCGCAGGACTGATCGCTATCGTGTGATGCTCAC  
AATCATGCTGTGCTGCATGACAAGCTGTTGTTCTGTGCTGAAGGGCTGCTGTAGCTGTGGCTCTTGAGGA  
TCCACTAGTCCAGTGTGGTGAATTTCTGCAGATATCCAGCACAGTGGCGGCCCTCGAGTCTAGAGGGCC  
CGTTTAAACCCGCTGATCAGCCTCGACTGTGCCCTCTAGTTGCCAGCCATCTGTTGTTGCCCTCCCC  
GTGCCCTTCTTACCCCTGGAAGGTGCCACTCCCCTGTCTTTCTAATAAAAATGAGGAAATTCATCGC  
ATTGCTGTAGTAGGTGCTATTCTATTTCTGGGGGGTGGGGTGGGGCAGGACAGCAAGGGGGAGGATTTGGGA  
AGACAATAGCAGGCAATGCTGGGATGCGGTGGGCTTATGGCTTCTGAGGCGGAAAGAACCAGCTGGGGC  
TCTAGGGGGTATCCCCACGCGCCCTGTAGCGGGCATTAAGCGCGCGGGTGTGGTGGTTACGCGCAGCG  
TGACCCTACACTTGCAGCGCCCTAGCGCCGCTCCTTTTCGCTTCTTCCCTTCTTCTCGCCACGTT  
CGCCGGCTTTCCCGTCAAGCTCTAAATCGGGGGCTCCCTTTAGGGTTCCGATTTAGTGTCTTACGGCAC

CTCGACCCCAAAAACTTGATTAGGGTGATGGTTCACGTAGTGGGCCATCGCCCTGATAGACGGTTTTTC  
GCCCTTTGACGTTGGAGTCCACGTTCTTTAATAGTGGACTCTTGTCCAAACTGGAACAACACTCAACCC  
TATCTCGGTCTATTTCTTTGATTTATAAGGGATTTTGGCGATTTTCGGCCTATTGGTTAAAAAATGAGCTG  
ATTTAACAAAAATTAACGCGAATTAATTCTGTGGAATGTGTGTCAGTTAGGGTGTGGAAGTCCCAGG  
CTCCCCAGCAGGCAGAAGTATGCAAAGCATGCATCTCAATTAGTCAGCAACCATAGTCCC GCCCTAA  
GGCTCCCCAGCAGGCAGAAGTATGCAAAGCATGCATCTCAATTAGTCAGCAACCATAGTCCC GCCCTAA  
CTCCGCCCATCCC GCCCTAACTCCGCCAGTTCGCCCATTTCTCCGCCCATGGCTGACTAATTTTTTT  
TATTTATGCAGAGGCCGAGGCCCTCTGCCTCTGAGCTATTCCAGAAGTAGTGAGGAGGCTTTTTTTGGA  
GG

Amino acid sequence of spike protein of Wuhan strain:

MFVFLVLLPLVSSQCVNLTTRTQLPPAYTNSFTRGVYYPDKVFRSSVLHSTQDLFLPFFSNVTWFHAIHVSNGTNGTKRFDNPVLPF  
NDGVYFASTEKSNIRGWIFGTTLDSKTQSLIVNNAITNVVIKVCDFQCNDFLGVYHKNKSWMESEFRVYSSANNCTFEYVS  
QPFLMDLEGKQGNFKNLREFVFNIDGYFKIYSKHTPINLVRDLPPQFSALEPLVDLPIGINITRFQTLALHRSYLT PGDSSSGW  
TAGAAAAYVGYLQPRFTLLKYNENGTITDAVDCALDPLSETKCTLKSFTVEKGIYQTSNFRVQPTESIVRFPNITNLCPFGEVFN  
TRFASVYAWNRRKIRSNVADYSVLYNSASFSTFKCYGVSPTKLNLDLCTNVYADSFVIRGDEVRQIAPGQTGKIADYNYKLPDFFT  
GCVIAWNSNNLDSKVGNNYNYLRLFRKSNLKPFFERDISTEIQAGSTPCNGVEGFNCYFPLQSYGFQPTNGVGYQPYRVVLSFE  
LLHAPATVCGPKKSTNLVKNKCVNFNFNGLTGTGVLTESNKKFLPFQFGRDIADTTDAVRDPQTLIILDITPCSFGGVSVITPGT  
NTSNQVAVLYQGVNCTEVPVAIHADQLTPTWRVYSTGNSVVFQTRAGCLIGAHEVNNSYECDIPIGAGICASYQTQNSPGGGGSVA  
SQSIIAYTMSLGAENSVAYSNNISAIPTNFTIISVTEILPVSMTKTSVDCTMYICGDSSTECNLLLQYGSFCTQLNRLALTGIAVEQ  
DKNTQEVFAQVKQIYKTPPIKDFGGFNFSQILPDPSPKSKRSFIEDLLFNKVTLDAGFIKQYGDCLGDIAARDLCAQKFNGLTV  
LPPLLTDEMIAYTSALLAGTITSGWTFGAGAALQIPFAMQMAYRFNGIGVTQNVLYENQKLIANQFNSAIGKIQDLSSTASALG  
KLQDVVNQNAQALNLTQVQLSSNFGAISVLDLISRLDPPAEVQIDRLITGRLQSLQTYVTQQLIRAAEIRASANLAATKMSEC  
VLGQSKRVDFCGKYHLMSFPQSAPHGVVFLHVTVPAQEKNFTTAPAI CHDGHKAFHPREGV FVSNGTHWFVTQRNFYEPQIITTD  
NTFVSGNCDVVIGIVNNTVYDLPQLPELDSFKEELDKYFKNHTSPDVLGDISGINASVVNIQKEIDRLNEVAKNLNESLIDLQELG  
KYEQ-

### Delta Strain (B.1.617.2) DNA sequence synthesized

ATGTTTCGTGTTCCCTGGTGCTTCTGCCACTGGTGTCTAGCCAGTGCCTGAACTCAGAA  
CCAGGACCCAGCTGCCCCCTGCCTACACCAATTCCTTTACCAGAGGCGTCTACTACCCGATAAGGTGTT  
CAGAAGCTCCGTGCTGCACAGCACACAAGACCTGTTCTCGCCATTCTTCAGCAATGTGACATGGTTCCAC  
GCCATCCACGTGTCCGGCACCAATGGCACAAAGCGGTTTCGACAACCCCGTGCTTCTTTTAAACGACGGCG  
TGTACTTTTGCAGCACAGAAAAGAGCAACATCATCAGGGGCTGGATCTTCGGAACCACCCTGGACAGCAA  
GACCCAGTCCCTGTAATCGTGAACAACGCCACCAACCTGGTGCATCAAGGTGTGCGAGTTCAGTTTGT  
AACGACCCCTTCTTGACGTGTACTACCATAAGAACAAGAGCTGGATGGAAAAGCGGCGTGTACAGCT  
CTGCCAATAATTGCACATTTGAGTACGTGAGCCAGCCTTCTCTGATGGACCTGGAAGGCAAGCAAGGCAA  
CTTCAAGAACCTGCGGGAGTTTCGTGTTCAAGAACATCGACGGCTACTTCAAGATCTACAGCAAGCACACC  
CCCATCAATCTGGTTAGAGACCTGCCTCAGGGCTTCTCTGCCCTGGAACCTCTGGTGGACCTGCCATCG  
GCATCAACATCACAAAGATTTAGACCCCTGCTGGCCCTGCACAGATCCTACCTGACCCCTGGAGATAGCAG  
TCCCGGCTGGACCCCGGCGCTTACTACGTGGGCTACCTGCAGCCTAGAACTTCTCTGCTGAAA  
TACAAATGAGAACGGCACTATTACAGACCGCTTGACTGCGCCCTGGACCCCTGTCTGAGACAAAAGTGCA  
CCCTGAAATCATTTACCGTGGAAAAGGGCCTATATCAGACCTCTAATTTCCGGGTGCAGCCTACAGAGAG  
CATCGTGGGTTCCCTAACATAACAAACCTGTGCCCTTTCGGCGAGGTGTTCAACGCCACGAGATTCGCC  
AGCGTGTATGCCTGGAATAGAAAGAGAATCAGTAATTTGTGTGGCCGACTACTCTGTGCTCTACAACTCTG  
CCAGTTCAGCACCTTCAAGTGCTACGGCGTACGCCAACAAGCTGAATGACCTCTGCTTTACAACCTG  
GTACGCCGACTCTTTCGTGATCAGAGGTGACGAGGTGCGCCAGATCGCCCTGGCCAAACCGGCAAGATC  
GCTGACTACAACATAAGCTGCCTGATGATTTACCAGGATGTGTGATCGCCTGGAACCTCCAACAACCTTGG  
ATTCTAAGGTGGGCGGAAATTACAACATACAGATACCGGCTGTTTAGAAAAGAGCAACCTGAAACCTTTCGA  
GAGAGACATCAGCACCGAGATCTACCAGGCCGGAAGCAAGCCCTGCAACGGCGTGAAGGCTTCAACTGC  
TACTTCCCTCTGCAATCTTATGGGTTTCAGCCTACCAACGGCGTGGATAACCAGCCCTACAGAGTGGTGG  
TCCTGAGCTTCAGCTGCTTACGCTCCTGCTACAGTCTGCGGACCTAAGAAGTCTACCAACCTGGTCAA  
GAACAAGTGTGTGAACTTTAATTTTAAACGGGCTGACCGGCACCGGCGTGTGACTGAAAGCAACAAGAAA  
TTCTTGCATTTTTCAGCAGTTCGGCAGAGACATTTGCTGACACCACAGATGCCGTGAGAGACCTCAGACAC  
TGGAGATCCTGGACATCACCCCTTGTAGCTTTGGAGGGGTGAGCGTCAACGCCCGGCACCAACAAG  
CAATCAAGTGGCCGTGCTGTACCAGGGCGTGAACGCACCGAGGTGCCGGTGGCAATCCACGCCGATCAG  
CTGACACCTACCTGGCGGTATACAGCACAGGCTCTAACGTGTTCCAGACCAGAGCCGGCTGTCTGATCG  
GCGCCGAGCACGTGAACAACAGCTATGAGTGTGACATCCCTATCGGCGCCGGAATTTGCGCCTCTTACCA  
GACACAGACTAATAGCAGAGGCAGCGCCTTAGCGTGGCCAGCCAGAGCATCATCGCCTATACGATGAGC  
CTGGGGGTGAGAACAGCGTGGCCTACAGCAACAACAGTATCGCGATCCCCACCAACTTCACCATCAGCG  
TGACCACAGATCCTTCCCGTGAGCATGACCAAAACCTCTGTGGACTGTACTATGTACATCTGCGGCGA  
TTCCTACCAGAAATGCAGCAATCTGCTGCCAGTATGCTCCAGTATGCTCATTCTGCACCCAGCTGAACAGCCCTGACC  
GGCATCGCCGTGGAACAGGACAAGAACACACAAGAGGTGTTTCGCCAGGTGAAGCAGATCTATAAGACAC  
CTCCTATCAAGGACTTCGGCGGCTTAACTTTCAGTCAAATCCTGCCCGATCCTTCTAAGCCAAGCAAGCG  
GAGCCCATCGAGGACCTGCTGTTCAACAAGTGACCTGGCCGATGCCGGCTTCATCAACAGTACGGC

GATTGTCTGGGCGACATCGCCGCCAGAGACCTGATTGCGCCCAAAGTTCAACGGACTGACAGTGCTTC  
CTCCTCTGCTGACCGATGAGATGATCGCCAGTACACAAGCGCCCTGCTGGCCGGCACAATCACAGCGG  
CTGGACCTTCGGCGCGGGCCCTGCTCTGCAGATACCCTTCCCCATGCAGATGGCCTACAGATTC AACGGC  
ATCGGAGTGACCCAGAAGCTCTGTACGAAAACAGAAGCTCATCGCTAATCAGTTCAACTCCGCTATCG  
GCAAGATCCAGGACGCTGAGCAGCACACCATCTGCACCTGGGCAAGCTCCAGAAGCTGGTGAACCGAA  
CGCCAGGCTCTGAACACTCTGGTCAAGCAGCTGAGCTCCAACCTCGGAGCCATCAGTAGCGTTCTGAAC  
GACATCTGTCCAGACTCGACCCACCAGAGGCCGAAGTGCAGATCGACAGGCTGATTACAGGCAGACTGC  
AGTCCCTGCAAACATACGTGACCCAGCAGCTGATCCGGGCCGCCAAATCAGAGCCAGTGCCAACCTGGC  
CGCTACGAAGATGCTGAATGCGTCTGGGACAGAGCAAGCGTGTGGATTTCTGCGGAAAAGGCTACCAC  
CTGATGAGCTTTCCCTCAGTCTGCCCCGACGGCGTGGTGTTCCTGCATGTGACCTACGTGCCCGCCAGG  
AGAAAAATTTCAACAACCGCCCTGCCATTTGCCACGACGGCAAGGCCACTTCCCAGAGAAGCGGTGT  
CGTGTCTAACGGCACCCACTGGTTCGTGACACAAAAGAACTTCTACGAGCCTCAGATCACCACCGAC  
AACACCTTCGTAAGCGGCAATTGTGACGTGGTGTATCGGTATCGTGAACAACACCGTGTACGACCCGCTGC  
AGCCTGAGCTGGACTCTTTCAAAGAGGAACTCGACAAATACTTCAAGAACCACACCAGCCCTGACGTGGA  
TCTGGGAGACATCTCCGGCATCAACGCCAGCGTGGTAAACATCCAGAAGGAAATCGACCGGCTGAATGAG  
GTGGCCAAGAACCTGAACGAGAGCCTGATCGACTTGCAGGAGCTGGGCAAATACGAGCAG

Amino acid sequence of spike protein of Delta strain:

MFVFLVLLPLVSSQCVNLRTRTQLPPAYTNSFTRGVYYPDKVFRSSVLHSTQDLFLPFFSNVTWFHAIHVS  
GNTGTRKFRDNPVLPFNDGVYFASTEKSNIIRGWIFGTTLDSKTQSLLI VNNATNVVIKVECFQFCNDPFLD  
VYHKNKNSWMESGVYSSANNCTFEYVSQPF LMDLEKQGNFKNLREFVFKNIDGYFKIYSKHTP  
INLVRDL PQGFSALEPLVDLP IGINITRFQTLALHRSYLT PGDSSSSGWTA GAAAYVYG  
LQPRTFLLKYNENGTITDAVDCALDPLSETKCTLKSFTVEKGIYQTSNFRVQPTESIVRFP  
NITNLCPFGVEFNATR FASVYAWNRKRISNCVADYSVLVNSASFSTFKCYGVSPTKLN  
DLCFNTVYADSFVIRGDEV RQIAPGQTGKIADYNYKLPDDFTGC VIAWNSNLD  
SKVGGNYNYR YRLFRKSNLKPFERD ISTEIYQAGSKPCNGVEGFNCFYPLQSYGFQ  
PTNGVGYQYPRVVVLSFELL HAPATVCGPKKSTNLVKNKCVNFNFNGLTGTGVL  
TESNKKFLPFQQFGRDIADTTDAVRDPQTL EILDITPCSFGGVSVITPGTNT  
SNQVAVLYQGVNCTEVPVAIHADQLTPTWRVYSTGSNVFQTRAGCLIGAEHVNNSY  
ECDIPIGAGICASYQTQ TNSRGSASSVASQ SIIAYTMSLGAENSVAYSNN  
SIAIPTNFTISVTTEILPVSMTKTSVDCTMYICGDS TECSNLLLQYGSFCTQLN  
RALTGIAVEQDK NTQEVFAQVKQIYKTPPIKDFGGFNFSQILPDPSPSKRSPIED  
LLFNKVTLADAGFIKQYGDCLGDI AARDLICAQKFNGLTVLP PLLTDEMIAQYTS  
ALLAGTITSGWTFGAGPALQI PPFMQMAYRFNGIGVTQNVLYENQKLIANQFNSA  
IGKIQDLSSTPSALGKL QNVVNQNAQALNTLVKQLSSNFGAISSVLNDILSR  
LDPPEAEVQIDRLITGRQLSLQTYVTQQLIRAAEIRASANLAATKMSECVL  
GQSKRVDFCGKGYHLSMFPQSAPHGVVFLHVTYVPAQEKNFTTAPAICH  
DGKAHF PREGV FVSNGTHWVFVTRNFYEPQIITDNT FVSGNCDVVI  
GIVNNTVYDPLQPELDSFKEELDKYFKNHTSPDVLDGDISGINASV  
VNIQKEIDRLNEVAKNLNESLIDLQELGKY EQ-

Omicron-BA1 Nucleotide sequence:

atgttcgtgttccctggtgttattgcctctggtttctagccaatgtgtcaacctcaccacacggaccagctgcctcctgcctacac  
caactccttaccagagggcgtgtactaccctgataagggtttcagatcctccgctgctgcacagcaccaggacctgttctctccct  
tcttcagcaacgtgacttggttccacgtgatcagcggtaacaaatggcacaacggttcgacaacctgtgctgcttccatgat  
ggcgtgtacttcgagcactcgagaagtcacaatcactcagaggtggatccttcggcaccacctggatagcaagacacagctctc  
actgattgtgaacaatgccaccaatgtggtgattaagggtgtgaggttccagttttgtaataacccttttctggaccacaagaata  
acaagagctggatggaagcaggttccgggtgtacagctctgccacaactgcacctttgatacgtctctcaactttcctgatg  
gacctggaaggcaagcagggaaattcaagaacctgagagaattgtgtttaaagaacatcgacggctacttcaagatctacagcaa  
gcacacaccatcatcgtgagagaaccagaagacctgcctcagggctcagcgcctggaacctctggtggacctgccaatcggta  
tcaacatcaccagattccagacactgctggcctgcatagatcctacctgacacctggagactccagctccggctggacagccggc  
gctgctgactactcgtggcctacttgcagcctagacaacttccctgtaagataatgagaacggcaccatcaagatgcccctcga  
ttgtgacctggacctctgtctgagacaaaatgaccctgaagagcttcacagtggaagggaaattaccagacaagcaactttc  
gtgtccagcctacagaatctatcgtgcggtttcctaacatcacgaacctgtgcccatttgatgaggtctttaacgccaccagattc  
gcctcctgctacgctggaatagaaagcggatcagcaactgtgtgcccgactactcagtgctgtacaacctggccctttttcac  
cttcaagtgtacggcgtgagcccaaccaagctgaacgacctgtgcttcacaaacgtgtacgcccactcattcgtgatcagaggag  
acgaagtggcgcagatcgctcctggccagaccggcaacattgcccactacaactataagctcccagacgacttcaccggctgtgtg  
atcgctggaacagcaacaagctggatagcaaggtgagcggcaattacaactacctgtatcggctgttcagaaagagcaacctgaa  
gcccttcgagcgggacatctccaccgaaatctaccaagctggaacaacgcttgcaacggcgtggcggattcaactgctacttcc  
ccctgaagagttactcttttagacctacctatggagtcggccaccagccctacagagtggtggtcctgagcttcgagctgctgcac  
gcccctgccacagtgctggggcctaagaaatctacaacctggctcaagaacaagtcggtgaatttcaacttcaatggcctgaagg  
caccggggtgctgacagagcaacaagaagttcctgcctttccagcagttcggctcgggacatcggcagaccaccgacgcccgtgc  
gcatccccagaccttagaaatcctggacatccccctgcagcttcggggcgtgagcgtgatccccaggcacaacactagc  
aaccagtgccagctgtatatacagggcgtgaactgtacagaagtgcccgtggtatccacgcccagaccagctgacccccacatggag  
agttactctacggctccaactgttccagacacggcggcgtgctgatcggcggcgaataatgtgaacaacagctcagatggtgtg  
atatccaatcggcgtggcatctgcgccagctacagaccagaccagagccacgggaagcggcagcgttgcagcagagc  
ataatcgctacaccatgtctctggcgctgaaaactccgtggcttatagcaacaactccattgcaattcccaccaatttcacaat  
ctcctgaccacagagatcctgcctgtgtccatgaccaagaccagtggtgactgcaccatgtacatctcggcgacagcagagat  
gttctaacctgctgctgcagtagcgtctttttgcacagctgaaaagagctctgacaggcatcgagtggaacaggacaagaat  
accagggaggtcttcgcccagggtgaagcagatctataagaccctcccatcaataacttcggcggcttcaacttcagccagatcct

gcctgatcctagcaagccatctaaacgggtcacccatcgaggacctgctgtttaacaaagtgacctggccgacgcccggattcatca  
aacagtacggcgactgcctgggcgacatcgccgcccagagatctgatttgcgcccaaaagtttaaggcctgacctgctccctcct  
ctgctgacccgacgagatgatcgcccagtaacaaagcgtctgctggccggcaccatcaccagcggtggacctcgccgctggccc  
tgccttgagatcccttccctatgcagatggcctacaggttcaacggcatcggggtgaccagaacgctgctgtacgagaaccaga  
agctgatcgcaaccaatcttaacagcgcctcggaataatccagacagctgtctagcacccttctgcccctggaagctgcag  
gatgtggtgaaccacaacgcccagcctgaacacccctggtgaaacagctgtccagcaaattcgccgcccacagcagcttcttaa  
cgacatcttctccagactggacctcctgaagccgaggtgcagatcgacagactgatcaccggcagactgcaaagtctgcagacct  
acgtgacacaacagctgatccgggcccgtgaaatcagagccagcgcctaatctggctgccacgaagatgagcagctgctgctgga  
cagccaagcgggtggatttttgcggaaaaggctaccacctgatgagcttccccaaaagcgcctccgacggcgtggttccctcca  
tgtgacctacgtgcccggccaggaaaaaacttcacaaccgcccctgccatctgccacgacggcaaggcccacttccctagagagg  
gctgtttgtgagcaacggcacacactggttctgacccaaagaaacttctacgacctcagatcatcaccacagataaacacctc  
gtctccggcaactcgacgtggtgatcgggattgtgaacaacacagctgtacgacctgacagctgagctggtatagcttcaaga  
ggaactggataaatactttaagaaccacacctctcctgacgtggatctagggcattatagcggaaatcaacgcttccgttgtgaaca  
tccagaaagagatcgacagactgaatgaagttgccaagaacctgaatgagagcctgatcgacctgacggagctgggcaagtacgag  
cagggcagcggatacatcctgagggcccctcgcgatggccaggctacgtgagaaaggacggcagtggtgctgctgagcacctt  
cttgggacggagcggacatcaccaccaccaccatcactgataatga

Amino acid sequence of spike protein of BA1 strain:

MFVFLVLLPLVSSQCVNLTTRTQLPPAYTNSFTRGVYYPDKVFRSSVLHSTQDLFLPFFSNVTWFHVISGTNGTKRFDNPVLPFND  
GVYFASIEKSNIIIRGWIIFGTTLDSKTQSLIVNNATNVVIVKCEFFQCNDFLDHKNKSWMESEFRVYSSANNCTFEYVVSQPFM  
DLEKQGNFKNLREVFVKNIIDGYFKIYSKHTPIIVREPDLDPQGFSALEPLVDLPIGINITRFQTLALHRSYLTGDDSSSGWTAG  
AAAYVGYLQPRFTLLKYNENGTITDAVDCALDPLSEKTKLSTFVEKGIYQTSNFRVQPTESIVRFPNITNLCPFDEVFNATRF  
ASVYAWNRRKRSINCVADYSVLYNLAPFFTFKCYGVSPTKLNLDLCTFNVYADSFVIRGDEVQRQIAPGQTGNIADYNYKLPDDFTGCV  
IAWNSNKLDKSVSGNYNYLRLFRKSNLKPFRDITSEIYQAGNKPCNGVAGFNCFPLKSYFRPTYGVGHQPYRVVLSFELLH  
APATVCGPKKSTNLVKNKCVNFFNGLKGTGVLTESNKKFLPFQQFRDIADTTDAVRDPQTLEILDITPCSFGGVSVITPGTNTS  
NQVAVLYQGVNCTEVPVAIHADQLTPTWRVYSTGSNVFQTRAGCLIGAEYVNNSEYCDIPIGAGICASYQTQTKSHGSASSVASQS  
IIAYTMSLGAENSVAYSNNSIAIPTNFTISVTTEILPVSMTKTSVDCTMYICGDSFTECSNLLLQYGSFCTQLKRALTGIAVEQDN  
TQEVFAQVKQIYKTPPIKYFGGFNFSQILPDPSPKSKRSPIEDLLFNKVTLADAGFIKQYGDCLGDI AARDLICAKFKGLTVLPP  
LLTDEMI AQYTSALLAGTITSGWTFGAGPALQIPFPQMAYRFNIGVTVNLYENQKLIANQFNSAIGKIQDSLSTPSALGKLQ  
DVVNHNALNTLVKQLSSKFGAISSVLNDIFSRLDPEAEVQIDRLITGRLQSLQTYVTQQLIRAAEIRASANLAATKMSKVLG  
QSKRVDFCGKGYHLSFPPQSAPHGVVFLHVITYPAQEKNFTTAPAICHDKAHFPRGCVFVSNGTWHWFVTRNFYEPQIITTDNTF  
VSGNCDVIGIVNNTVYDPLQPELDSFKEELDKYFKNHTSPDVLGDISGINASVVNIQKEIDRLNEVAKNLNESLIDLQELGKYE  
QSGGYIPEAPRDGQAYVRKDGWVLLSTFLGRSGHHHHHHHH

Omicron-BA2 Nucleotide sequence:

atgttctggttccctgctcctgctgcccattggtctctagccagtgctgaaacctgatcaccgacccagtcctacaccaacagctt  
cacacggggagtgactatcctgataaggtgtttagaagttccctgctccattctaccaggatctgttccctgcttctctcagca  
acgtgacctggttccacgcccattcacgtgagcggcactaacggcacaacaaagggttcgacaaccccgctgctaccttcaacgacggc  
gtgtacttcgccagcaccgagaagtctaataattatcaggggatggatcttcggcagcaccctggacagcaagaccacaagcctgct  
gatcgtgaataatgccacaacgctggttatcaaggtgtgtgagttccagtttgcacgatccttccctggacgtgactaccaca  
agaacaacaagagctggatggaatctgagttcagagtgacagcagcgcacaacactgcacctttgagtacgtgtcacaacctttt  
ctgatggacctcgaggcaaacagggcaacttcaagaacctgagagagttctgctgttataaaatcgcagggctacttcaagatcta  
cagcaagcacacacctatcaactctggagcgcgtctgcccagctcttagcgcctctggaacccctggttgcacctctcagca  
ttaacatcaccggttccagacctgctggccctgcacagatcctatctgacctggagatagctcttctggtggaccgcccggc  
gcccgtgctactactggtggctacctgcagccaagaacattcctgctgaagtacaatgaaaacggcaccatcaccgatgcccgtgga  
ctgtgccctggacctctgagcagacaaagtgtacctaaagtcttccaccgtggaagggcatctatcagaccagcaacttta  
gagtgacgcccacagagagatcgtgcccgttcccaacatcacaacctgtgcccttccgacgaggtcttcaacgcccaccggtt  
gcttctgtttacgctggaatagaaagcggatcagcaactgctggccgactacagcgtgctgtacaacttcgccccttctctcgc  
ctttaagtgtaggggtaagccctacaaaactgaacagacctgtgcttaccacagctgtacgcccagctccttctgtacccgagga  
acgaggtgagccagatcgcccctggacagaccggcaacatcgccgattacaactacaagctgcccagcagactttacaggtcgcgtg  
atcgcttggaaacagcaacaagctggactctaaagtggggcggcaattacaactacctgtatagactgtttagaaagtccaacctgaa  
gccttccgagagagacatctccaccgagatctaccaggcggcaacaacacctgtaacggcgtggccggattcaattgttacttcc  
ccctcgagagctacggctcagacctacctacggcgtgggcccaccagccctaccgggtggtggtgctgagcttcgagctgctgcac  
gcccagccaccgctgctggccctaaagaagagcacaacctggtgaagaataagtgtgtgaaactcaattttaaggcctgaccgg  
caccggcgtgctgacagaagcaacaaaagttcctgcttctccagcagttcgggaagagacatagcagataccacagacgcccgtaa  
gagacctcagaccctggaatcctggacatcacacctcagaagctcggaggagctctctgtgatcaccggcaccacaaccagga  
aaccaggtggcctgctgtaccagggagtgaaatgacacagagctgctggcaatccacggcaccagctgaccctacatggcg  
ggtatactccaccggaagcaacgtgttccagaccagagcggctgtctgatcggcggcaggtacgtgaacaactcctacgaatgtg  
atattcccatcggggccggcatctgcgccagctacaaacacaaacaaagagccacggcagcgcagctctgtggccagccagctct  
atcatcgctacaccatgagcctggcgcagaaaatagcgtggcctacagcaacaacagcatcgccatccctaccaacttccat  
ctccgtgaccacagagatcctgcccgtgtctatgaccaagaccagcgtggactgcaccatgtacatctcgccgcatcttaccgagt

gctctaacctcctgctgcagtagcggcagcttctgcacacaactgaagagagccctgaccggcatcgccgtggaacaggacaagaat  
accagagggtcttcgctcaggtgaagcagatctataagaccccactatcaagtactttggcggttttaacttcagccagattct  
gcctgacccttctaaacctagcaaaagatcccctatcgaggacctgctcttcaacaaggtgacactggctgatgctggctttatca  
agcagtagcggcgactgcctgggcgacatcgccgctagagacctgatctgcccagaagttcaatggcctgactgtgctccctccc  
ctgctgacagacgaaatgatcgcccaatacaccagcgccttcttgcgggcacaatcaccagcgctggaccttcggcgctggccc  
tgccctccagatcccgttccctatgcagatggcttacagattcaacgggtatcgccgtgacacagaaacgtgctgtacgagaaccaga  
agctgatagccaaccagttcaacagcgccatcggaagatccaggacagtctgagcagcacaccaagcgccctgggcaacttcag  
gacgtcgtgaaccacaacgcccaggctctgaacactctggggaagcagctgtctagcaagtttggcgccatctccagcgttctgaa  
cgacatcctgtccagactggaccccccgaggccgaggttcagattgacagactgataaccggaagactgcagctctctgcaaacat  
acgtgacccagcagctgatacggggccgagatccgggcttccgctaactctggccgctacaaagatgagcgaatgcgtgctcggg  
cagagcaagagggtcgacttctgcggcaagggctaccacctgatgagcttccctcagtcgctccccacgggggtggtgcttctgca  
cgtgacctacgtgccagcccaggaaaaaactttaccaccgcccctgccatctgccacgatggcaagcccacttccctagagaag  
gcgtgttcgtgagcaatggcaccactgggttcgtgacacagagaaacttctacgagccacagatcatcacaacagataatacctt  
gttccggcaactgcgacgtcgttatcgccatcgtgaacaacacagtgtagcaccgctgcaaccgagctggatagtttcaagga  
ggaactggacaagtacttcaagaaccacaccagcccgatgtggatctgggagacatcagcggcattaacgcctccgtggtaaca  
ttcagaaagagatcgacagactcaacgaagtggaagaacctgaacgagagcctgatcgacctgaggagctgggcaagatgag  
cagggcagcggatacatccctgaagcccaagagatggccaggcctatgtgagaaaggatggcgaatgggtgctgctgagcacct  
cctgggaagaagcggccatcatcaccaccaccaccatcactgataatga.

Amino acid sequence of spike protein of BA2 strain:

MFVFLVLLPLVSSQCVNLIIRTRQSYTNSFTRGVYYPDKVFRSSVLHSTQDLFLPFFSNVTWFHAIHVSGTNGTKRFDNPVLPFNDG  
VYFASTSEKSNIIIRGWIFGTTLDSTKQSLILVNNATNVVIVKVFCEQFCNDPFLDVYHKNKSWMESEFRVYSSANNCTFEYVVSQPF  
LMDLEKQGNFKNLREFVFNKIDGYFKIYKHTP INLGRDLPQGFSALEPLVDLP IGINITRFQTLALHRSYLT PGDSSSGWTAG  
AAAYVGYLQPRFTLLKYNENGTITDAVDCALDPLSETKCTLKSFTVEKGIYQTSNFRVQPTESIVRFPNITNLCPFDEVFNATRF  
ASVYAWNRKRISNCVADYSVLYNFAPFFAFKCYGVSPTKLNLDLCTNVYADSFVIRGNEVSQIAPGQTGNIADYNYKLPDDFTGCV  
IAWNSNKLDSKVGNYNYLYRFLFRKSNLKPFERDISTEIQAGNKPCNGVAGFNCYFPLRSYGFPRPTYGVGHQPYRVVLSFELLH  
APATVCGPKKSTNLVKNKCVNFNFNGLTGTGVLTESNKKFLPFQQFGRDIADTTDAVRDPQTLEILDI TPCSFGGVSVITPGTNTS  
NQVAVLYQGVNCTEVPVAIHADQLTPTWRVYSTGNSVNFQTRAGCLIGAEYVNNSECDIPIGAGICASYQTQTKSHGSASSVASQS  
IIAYTMSLGAENSVAYSNNIAIPTNFTISVTTEILPVSMTKTSVDCTMYICGDSTECNLLLQYGSFCTQLKRALTGIAVEQDKN  
TQEVFAQVKQIYKTPPIKYFGGFNFSQILPDPSKPSKRSPIEDLLFNKVTLDAGFIKQYGDCLGDI AARDLICAQKFNGLTVLPP  
LLTDEMI AQYTSALLAGTITSGWTFGAGPALQIPFPMQ MAYRFNGIGVTQNVLYENQKLIANQFN SAI GKIQDSL SSTPSALGKLQ  
DVVNHNQAALNTLVKQLSSKFGAISSVLNDILSRLDPPEAEVQIDRLITGRQLSLQTYVTQQLIRAAEIRASANLAATKMSECVLG  
QSKRVDFCGKGYHLMSFPQSAPHGVVFLHVTVYPAQEKNFTTAPAI CHDGKAHF PREGVFVSNGTHWFVTQRNFYEPQIITDNTF  
VSGNCDVVI GIVNNTVYDPLQPELDSFKEELDKYFKNHTSPDVLGDISGINASVVNIQKEIDRLNEVAKNLNESLIDLQELGKYE  
QSGYIPEAPRDGQAYVRKDG EWVLLSTFLGRSGHHHHHHH

FigS1:

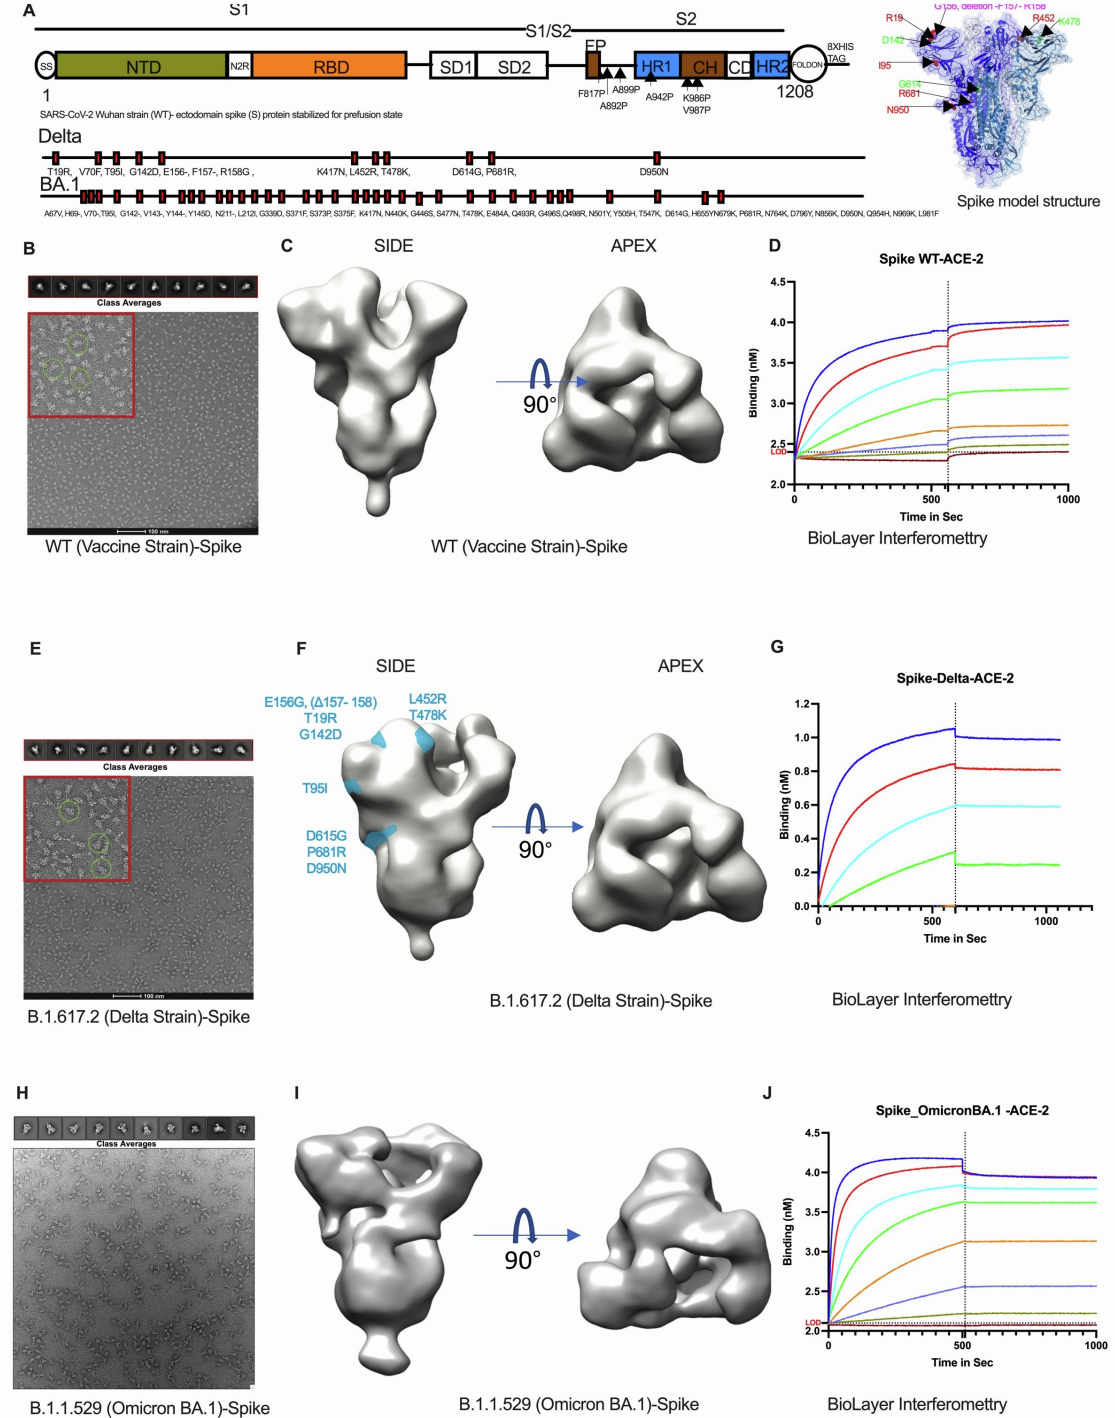

Figure S1. Development and validation of SARS-CoV-2 vaccine strain (Wuhan-WT), Delta, and Omicron BA.1 variant prefusion ectodomain spike targets for use in blockade of ACE-2 binding assay (BoAb). (A) SARS-CoV-2 spike (S) ectodomain proteins of WT (Wuhan strain), Delta (B.1.167.2) and Omicron BA.1 (B.1.1.529) for structural characterization and assay development, and a model construct of Delta S protein. (B, E and H) Raw negative stain electron micrographs for purified vaccine strain (B), delta variant (E), and Omicron variant (H) trimers. 2D class averages of various trimer orientations derived from the raw micrographs are shown in the upper panel and used for the 3D reconstruction shown in Panels C, F and I. (C,F,I) 3D reconstruction from negative stain electron microscopy class averages of our purified trimeric ectodomain of WT, Delta and Omicron BA.1. (D,G, and J) Biolayer interferometry analysis of each spike variant binding to an immobilized recombinant ACE-2 IgG Fc-chimera, the biotinylated form of which serves as the detector in our BoAb assay.

FigS2:

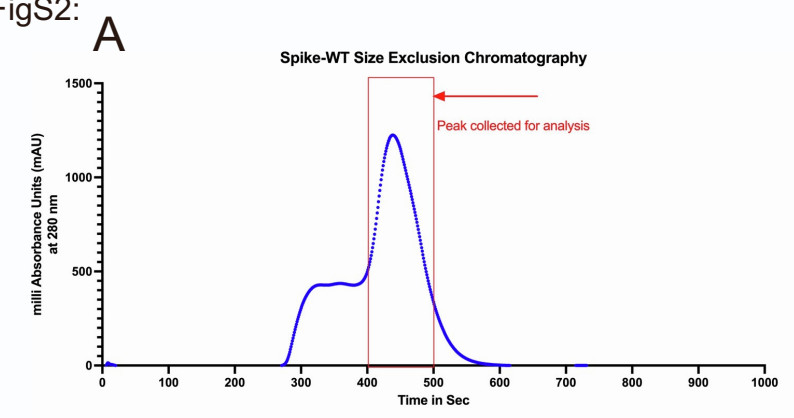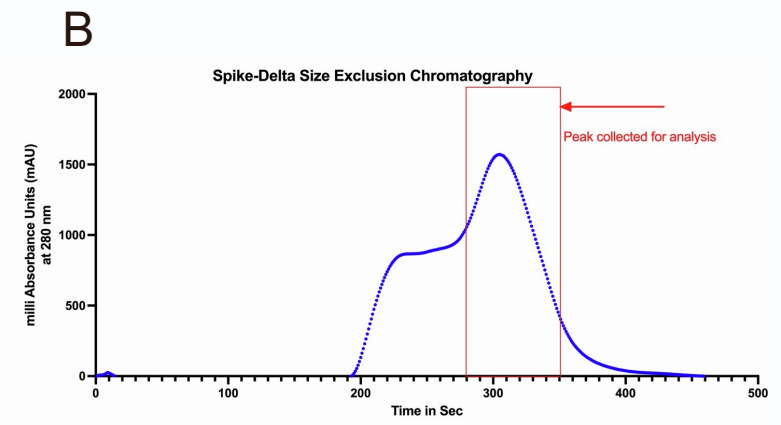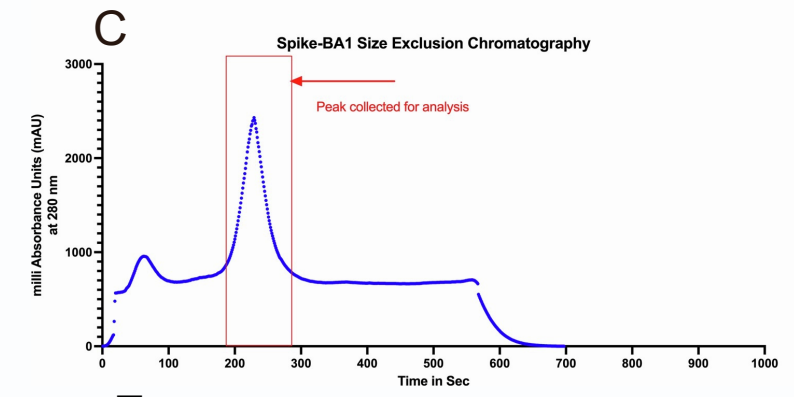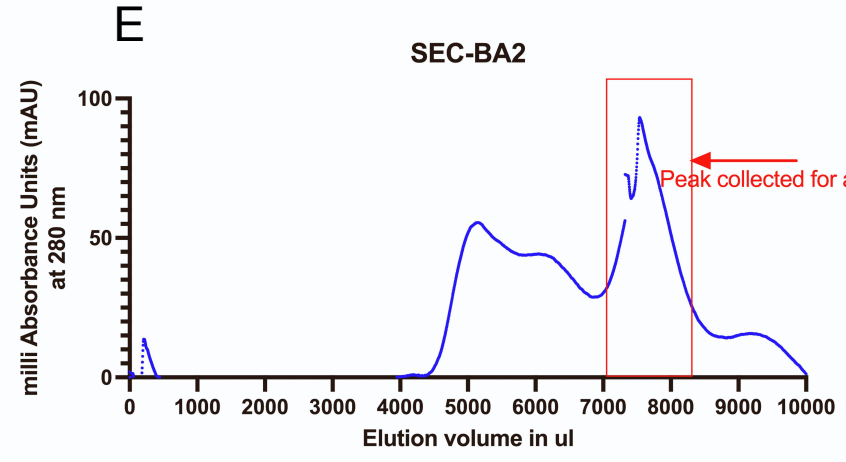

**D** WT Mw Delta BA1

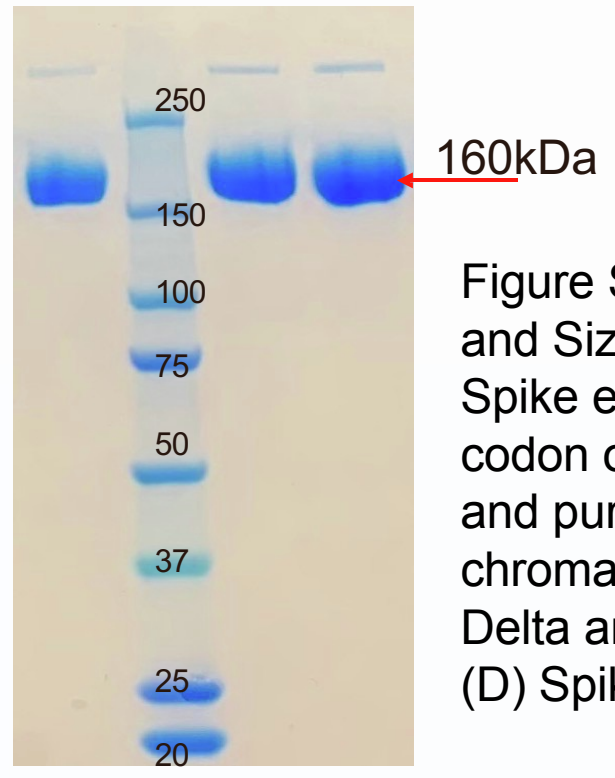

Figure S2: SARS-CoV-2 Spike protein purification and Size Exclusion Chromatographs. SARS-CoV-2 Spike ectodomain (1-1208 amino acids) human codon optimized plasmid transfected into 293F cells and purified the protein by affinity column chromatography, chromatograms A for WT, B for Delta and C and E for Omicron BA1 and BA2. (D) Spike protein Confirmation by SDS-PAGE.



FigS3:

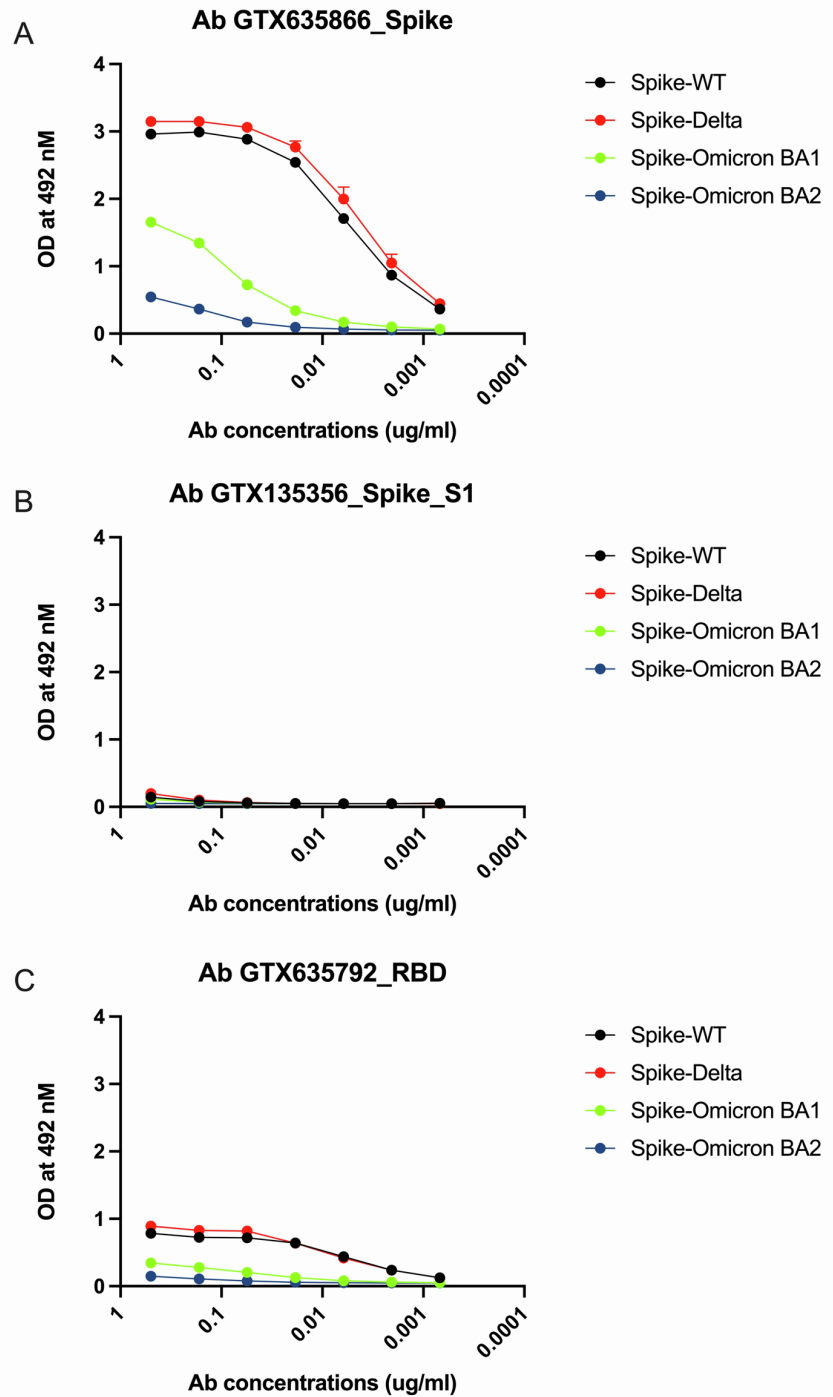

Figure S3. Binding properties of Spike variants of SARS-CoV-2. ELISA performed with 3-fold dilutions of selected monoclonal antibodies. (A) GTX635866 (GenTex) which targets the prefusion state of spike protein. This antibody shows very strong binding to Delta and Wuhan-WT and average to lower binding against Omicron variants BA1 and BA2, respectively. (B) GTX135356 (GenTex) which targets the S1 subunit of spike protein. This antibody shows very weak binding to all spike variants tested. (C) GTX635792 (GenTex) which targets the RBD of spike protein, and shows moderate binding to Delta and Wuhan-WT, but significantly lower binding to Omicron variants BA1 and BA2.

FigS4:

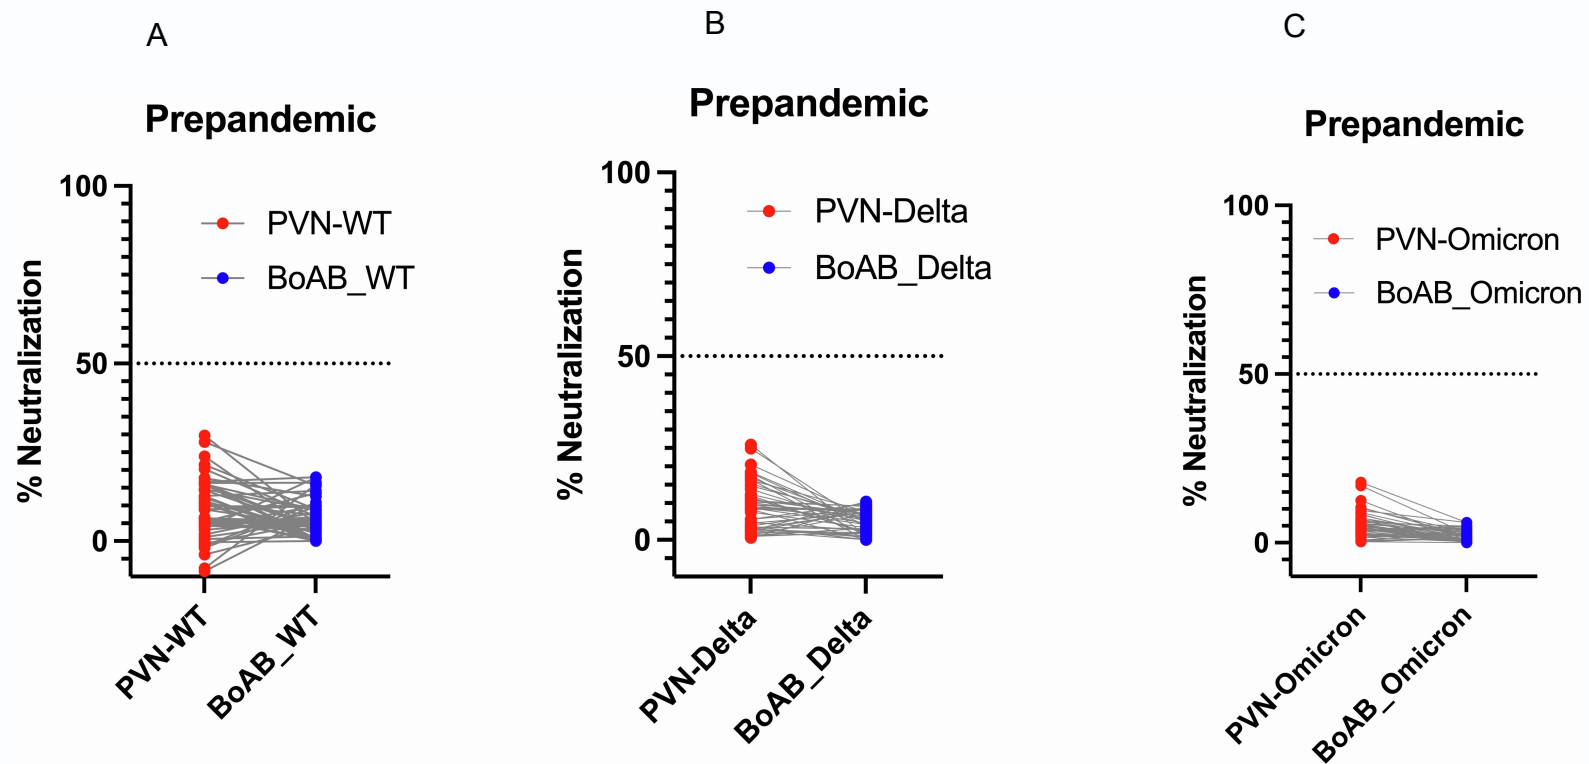

Figure S4: Comparison of BoAB and PVN assay on Prepandemic samples against SARS-CoV-2 variants. Pre-pandemic samples (n=50) tested against SARS-CoV-2 wuhan WT (A), Delta (B) and Omicron (C) variants in the pseudovirus neutralization assay and BOAB assay.

Fig.S5.

Figure S5: Correlation of Neutralizing antibodies between Un-infected/vaccinated vs Infected/vaccinated in BoAB assay and PVN assay.

Wuhan-WT-BoAB

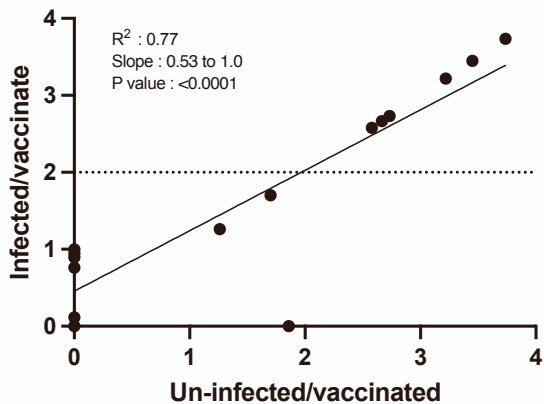

Delta-BoAB

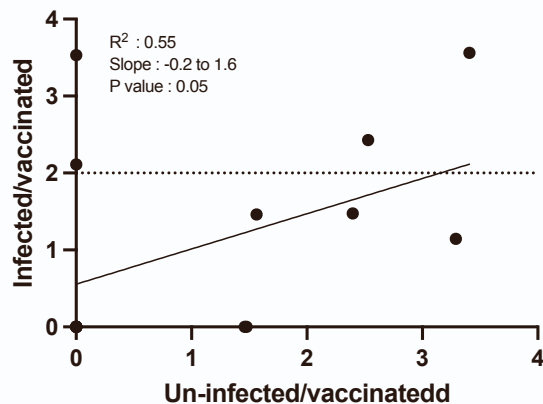

Omicron-BoAB

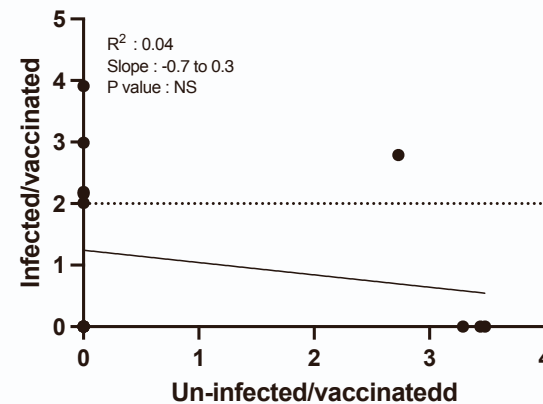

Wuhan-WT-PVN

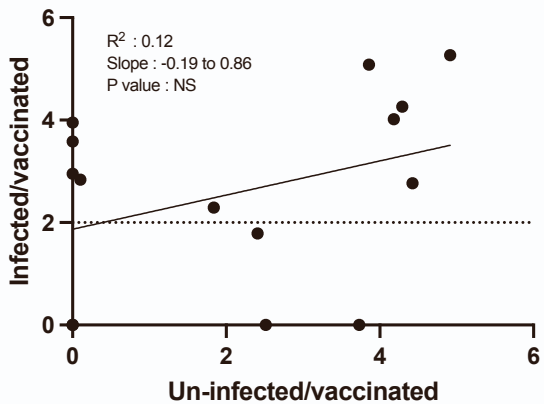

Delta-PVN

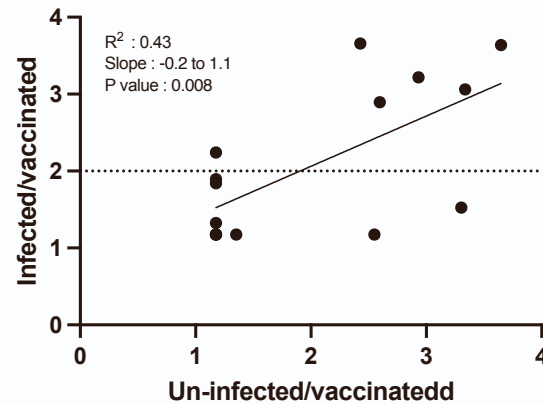

Omicron-PVN

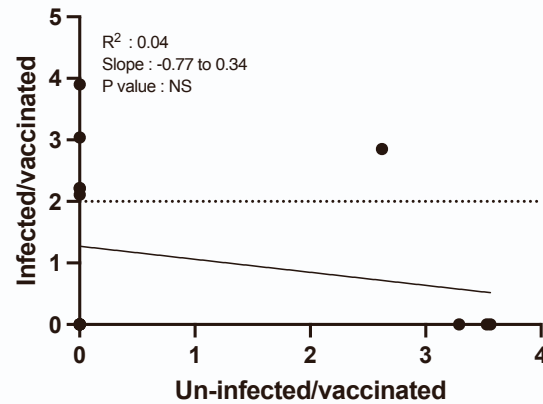

Supplement: mmc1.pdf [file mmc1.pdf]
